# Supplementary material
Source: PubMed Central journal article supplement (PMC6604050)
Supplement: NIHMS1033508-supplement-Supplemental_Materials.pdf [file NIHMS1033508-supplement-Supplemental_Materials.pdf]

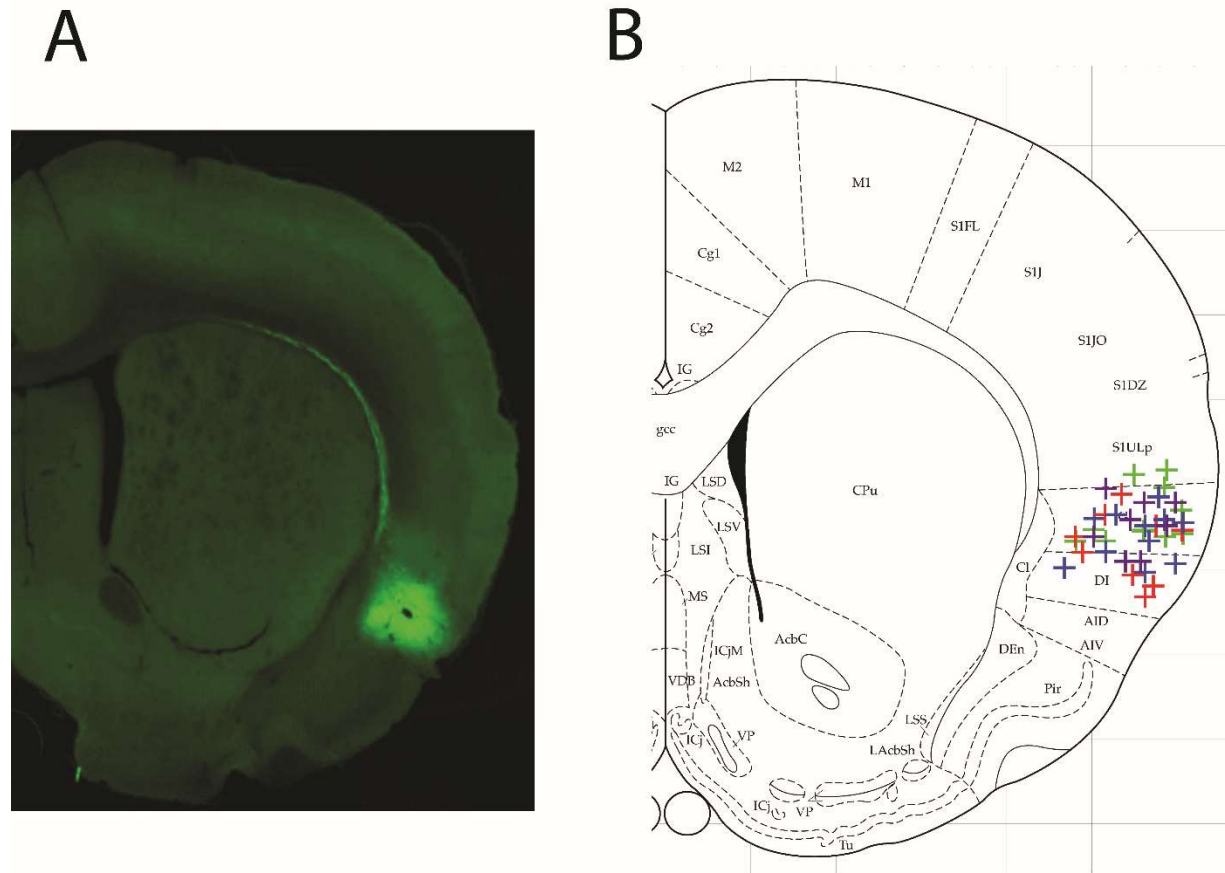

**Figure S1. Expression of ArchT in insular gustatory cortex (GC) Related to Figure 3.** (A) Example of viral infection of GC, as shown by the expression of the trans-gene GFP (in green). (B) Placement of optic fibers in GC for all rats in the different conditions: Retro, 4-day GCx (reprinted from [S1]) in green; Retro, 6-day GCx in red; Ortho, 6-day GCx in purple; and Cmbd/Ortho GCx in blue.

### Supplemental References

- S1 Maier, J.X., Blankenship, M.L., Li, J.X., and Katz, D.B. (2015). A Multisensory Network for Olfactory Processing. *Curr Biol* 25, 2642-2650.
